# Supplementary material
Source: publisher figshare collection journal article supplement (https://sage.figshare.com/ndownloader/files/15123161)
Supplement: Supplementary file 1 [file 15123161]

Action Observation in Cerebral Palsy

**Mirror neuron system activation in children with unilateral cerebral palsy during observation of actions performed by a pathological model**

| ROI Analysis | 2 x 2 rmANOVA: Condition x Group | | | |  | *p* values for paired *t* test (Bonferroni) | |
| --- | --- | --- | --- | --- | --- | --- | --- |
| Volume | Condition | Group | Condition x Group |  | AO Paretic > AO Healthy | (AO Paretic > Healthy)  UCP > TD |
| PPC | 1620 | *F*(1,18) = 9.39, *P* = 0.007 | *F*(1,18) = 0.007, *P* = 0.97 | *F*(1,18) = 24.58, *P* < 0.001 |  | *P <* 0.006 | *P <* 0.0001 |
| PMC | 1620 | F(1,18) = 11.52, P = 0.003 | *F*(1,18) = 0.36, *P* = 0.55 | *F*(1,18) = 19.11, *P* < 0.001 |  | *P <* 0.005 | *P <* 0.001 |

**Supplementary Table 2.** Statistical values for simple main effects, interactions and pairwise comparisons (Bonferroni) of each rmANOVAs performed in posterior parietal cortex (PPC) and premotor cortex (PMC) ROIs. ROI Volume indicates the total ROI size (voxels number).
